# Supplementary material
Source: PubMed Central journal article supplement (PMC7081400)
Supplement: ao9b04393_si_001.pdf [file ao9b04393_si_001.pdf]

## SUPPORTING INFORMATION

# Efficient and Straightforward Synthesis of Two United States Pharmacopeia Sitagliptin Impurities: 3-Desamino-2,3-Dehydrositagliptin and 3-Desamino-3,4-Dehydrositagliptin

Matej Sova,<sup>†,‡</sup> Rok Frlan,<sup>†,‡</sup> Stanislav Gobec<sup>†</sup>, Zdenko Časar<sup>†,§,\*</sup>

<sup>†</sup>University of Ljubljana, Faculty of Pharmacy, Aškerčeva 7, 1000 Ljubljana, Slovenia

<sup>§</sup>Lek Pharmaceuticals, d.d., Sandoz Development Center Slovenia, Verovškova ulica 57, SI-1526 Ljubljana, Slovenia

<sup>‡</sup>These authors contributed equally to this work.

E-mail: [zdenko.casar@sandoz.com](mailto:zdenko.casar@sandoz.com), [Zdenko.Casar@ffa.uni-lj.si](mailto:Zdenko.Casar@ffa.uni-lj.si)

### Table of Contents:

|                                                                                                                                           |     |
|-------------------------------------------------------------------------------------------------------------------------------------------|-----|
| Figure S1: <sup>1</sup> H NMR spectra of <b>9</b> in CDCl <sub>3</sub> .....                                                              | S2  |
| Figure S2: <sup>13</sup> C NMR spectra of <b>9</b> in CDCl <sub>3</sub> .....                                                             | S3  |
| Figure S3: HSQC of <b>9</b> .....                                                                                                         | S4  |
| Figure S4: HMBC of <b>9</b> .....                                                                                                         | S5  |
| Figure S5: Mass spectra of <b>9</b> (ESI+) .....                                                                                          | S6  |
| Figure S6: Mass spectra of <b>9</b> (ESI-) .....                                                                                          | S7  |
| Figure S7: HPLC chromatogram of <b>9</b> .....                                                                                            | S8  |
| Figure S8: <sup>1</sup> H NMR spectra of <b>10</b> in CDCl <sub>3</sub> .....                                                             | S9  |
| Figure S9: <sup>13</sup> C NMR spectra of <b>10</b> in CDCl <sub>3</sub> .....                                                            | S10 |
| Figure S10: HSQC of <b>10</b> .....                                                                                                       | S11 |
| Figure S11: HMBC of <b>10</b> .....                                                                                                       | S12 |
| Figure S12: Mass spectra of <b>10</b> (ESI+) .....                                                                                        | S13 |
| Figure S13: Mass spectra of <b>10</b> (ESI-) .....                                                                                        | S14 |
| Figure S14: HPLC chromatogram of <b>10</b> .....                                                                                          | S15 |
| Screening of appropriate base for regio-isomerization of <b>12</b> to <b>13</b> .....                                                     | S16 |
| Table S1: Base screening in the alkene regio-isomerization reaction.....                                                                  | S16 |
| Screening of optimal conditions for amide bond formation in coupling of <b>15</b> and <b>3</b> .....                                      | S17 |
| Table S2: Optimization of reaction conditions for amide bond formation to alkene impurity I ( <b>9</b> ).....                             | S18 |
| Screening of optimal solvent for amide bond formation in coupling of <b>15</b> and <b>3</b> .....                                         | S19 |
| Table S3: Solvent screening for amidation to alkene impurity I ( <b>9</b> ).....                                                          | S20 |
| Figure S15: NMR study of regio-isomerization process of <b>9</b> to <b>10</b> in deuterated DMF in the presence of NMM.....               | S21 |
| Figure S16: NMR study of regio-isomerization process of <b>9</b> to <b>10</b> in deuterated THF in the presence of Et <sub>3</sub> N..... | S22 |
| Reactions screening procedures described in tables.....                                                                                   | S23 |

**Figure S1**

*<sup>1</sup>H NMR spectra of 9 in CDCl<sub>3</sub>*

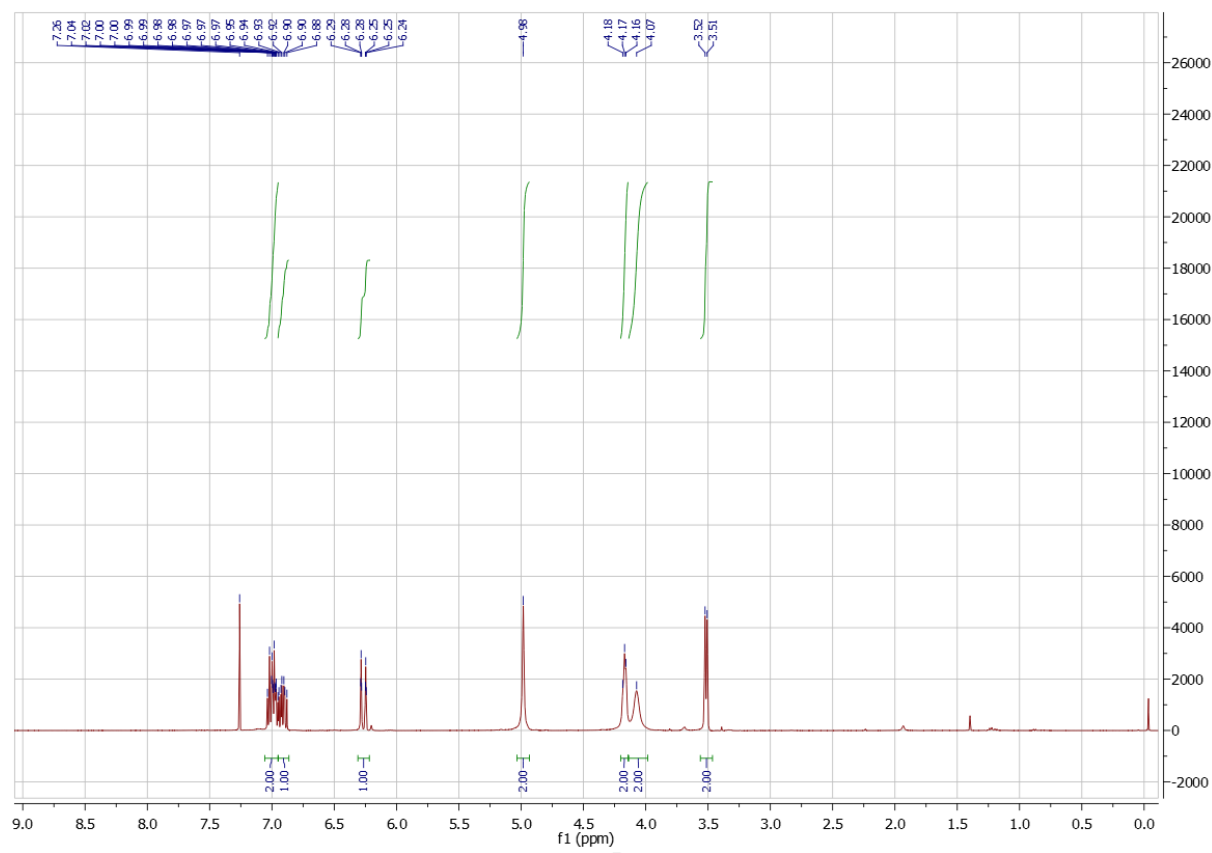

## Figure S2

$^{13}\text{C}$  NMR spectra of **9** in  $\text{CDCl}_3$

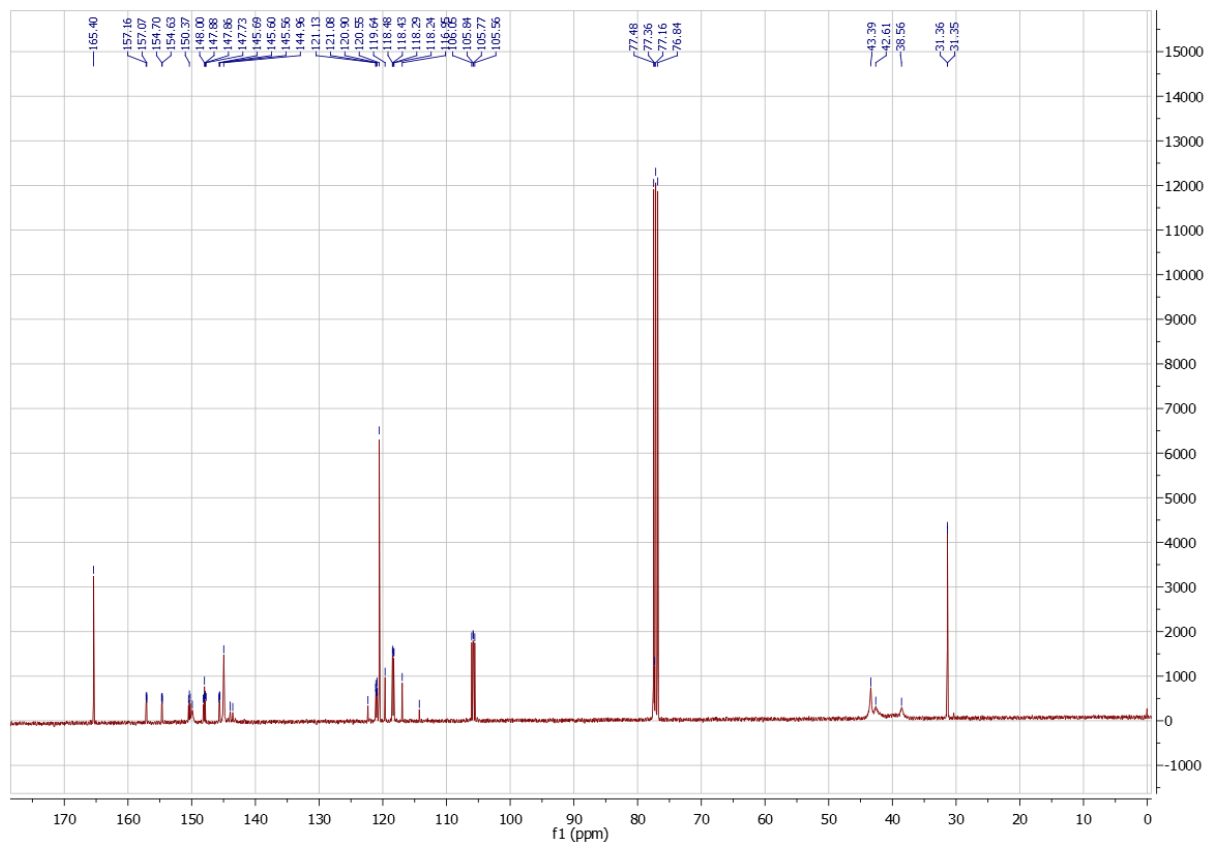

**Figure S3**

*HSQC of 9*

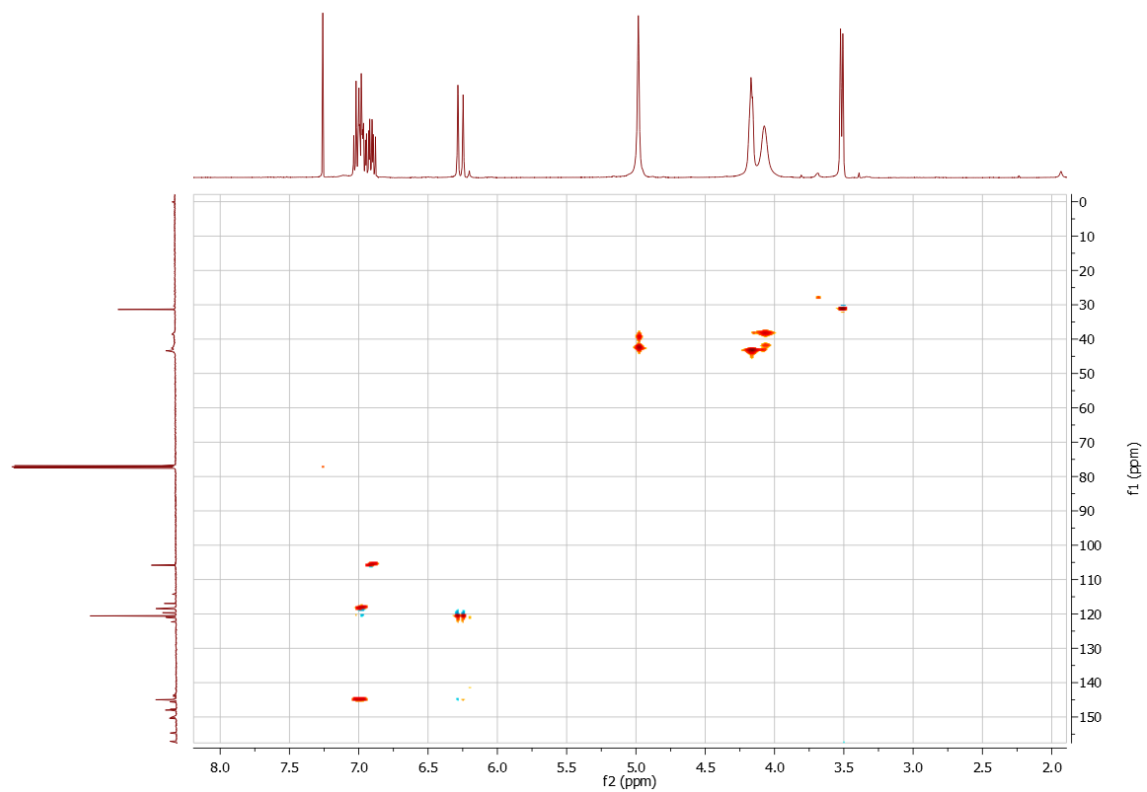

Figure S4

HMBC of 9

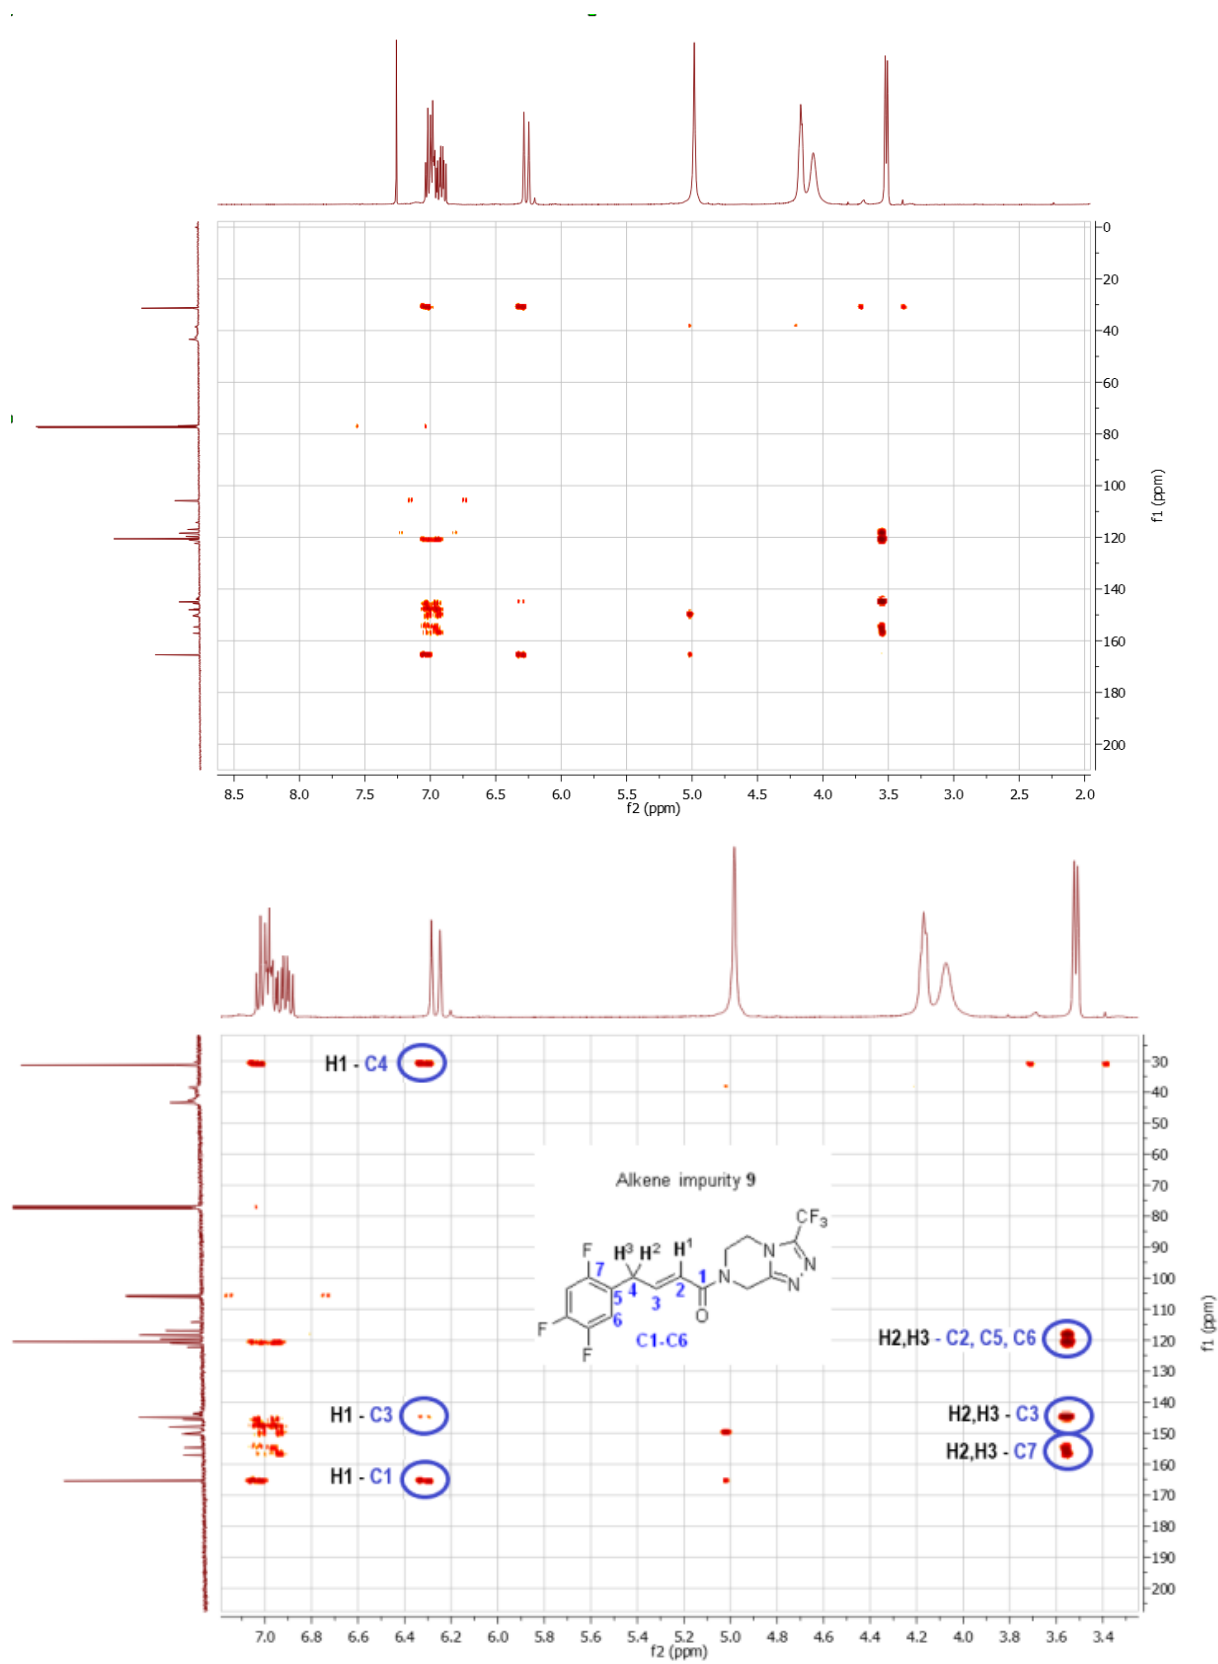

## Figure S5

### Mass spectra of **9** (ESI+)

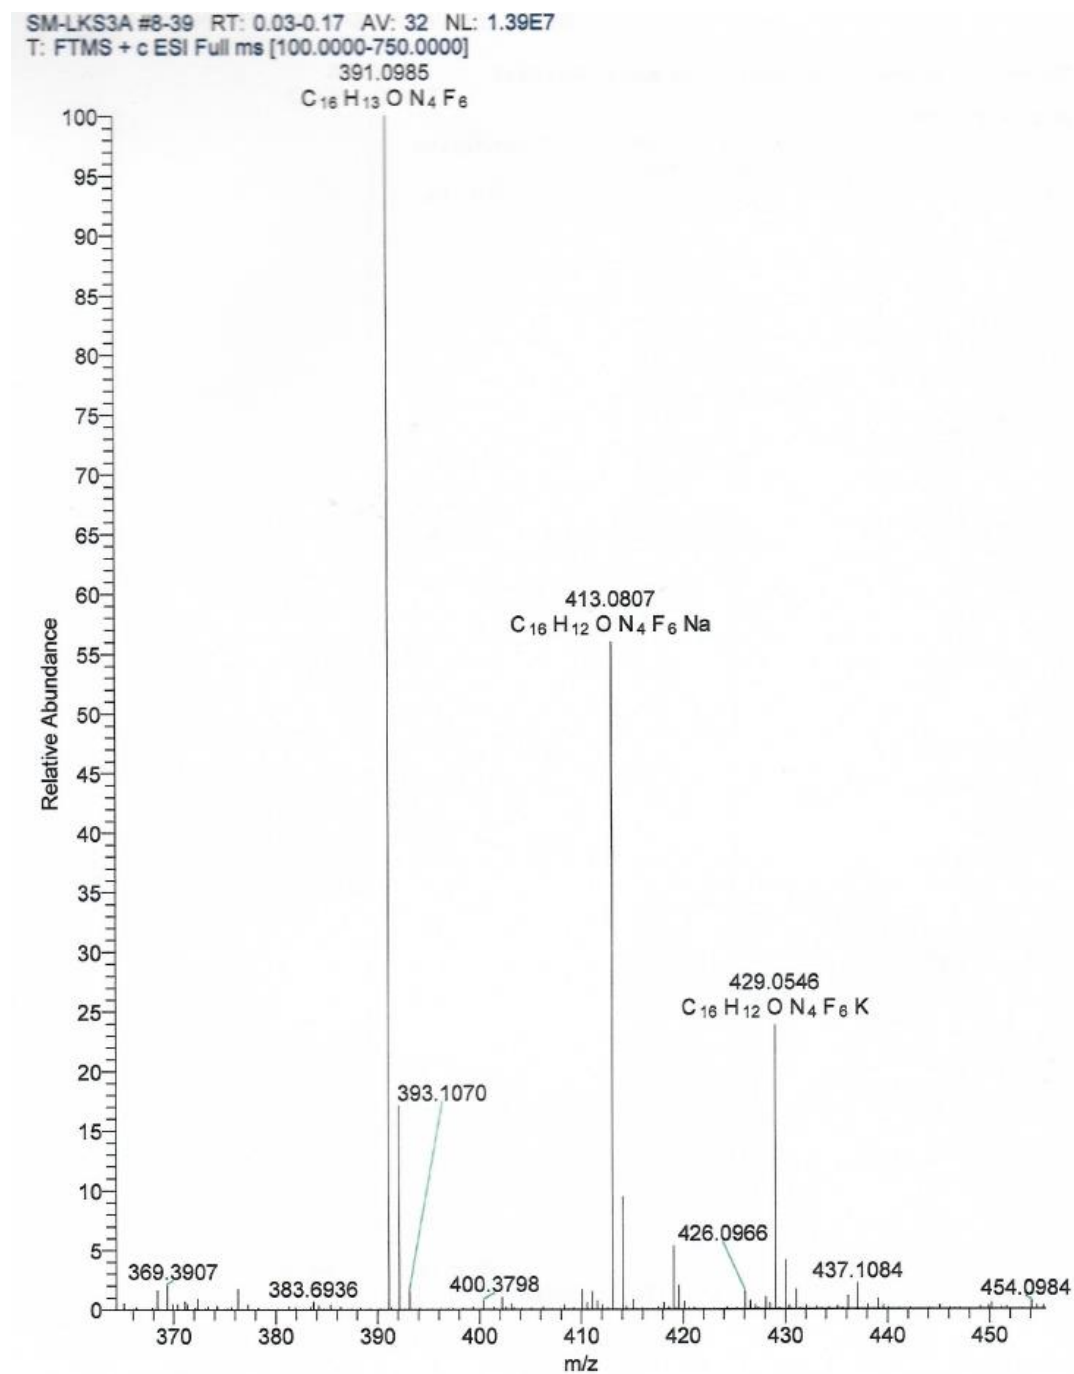

Elemental composition search on mass 391.0985

m/z= 386.0985-396.0985

| m/z       | Theo. Mass | Delta (ppm) | RDB equiv. | Composition                                                                  |
|-----------|------------|-------------|------------|------------------------------------------------------------------------------|
| 391.09853 | 391.09881  | -0.71       | 9.5        | C <sub>16</sub> H <sub>13</sub> O <sub>4</sub> N <sub>4</sub> F <sub>6</sub> |

## Figure S6

### Mass spectra of **9** (ESI-)

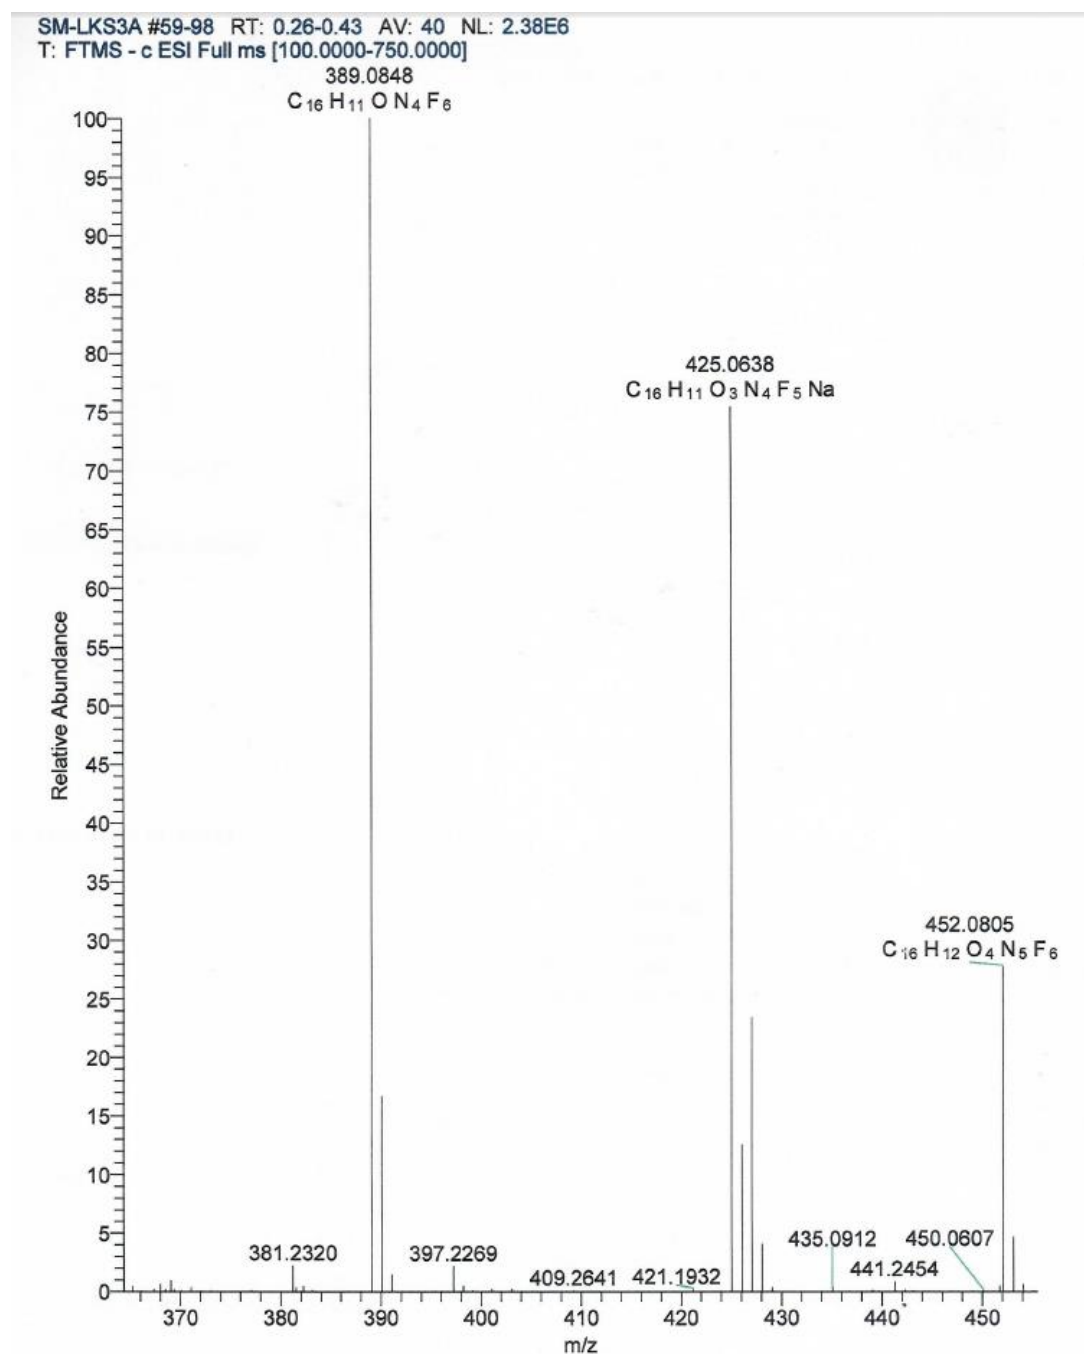

Elemental composition search on mass 389.0848

m/z= 384.0848-394.0848

| m/z       | Theo. Mass | Delta (ppm) | RDB equiv. | Composition             |
|-----------|------------|-------------|------------|-------------------------|
| 389.08476 | 389.08425  | 1.30        | 10.5       | $C_{16}H_{11}ON_4F_6$   |
|           | 389.08812  | -8.63       | 11.0       | $C_{16}H_{12}ON_5F_4Na$ |

**Figure S7**

HPLC chromatogram of **9**

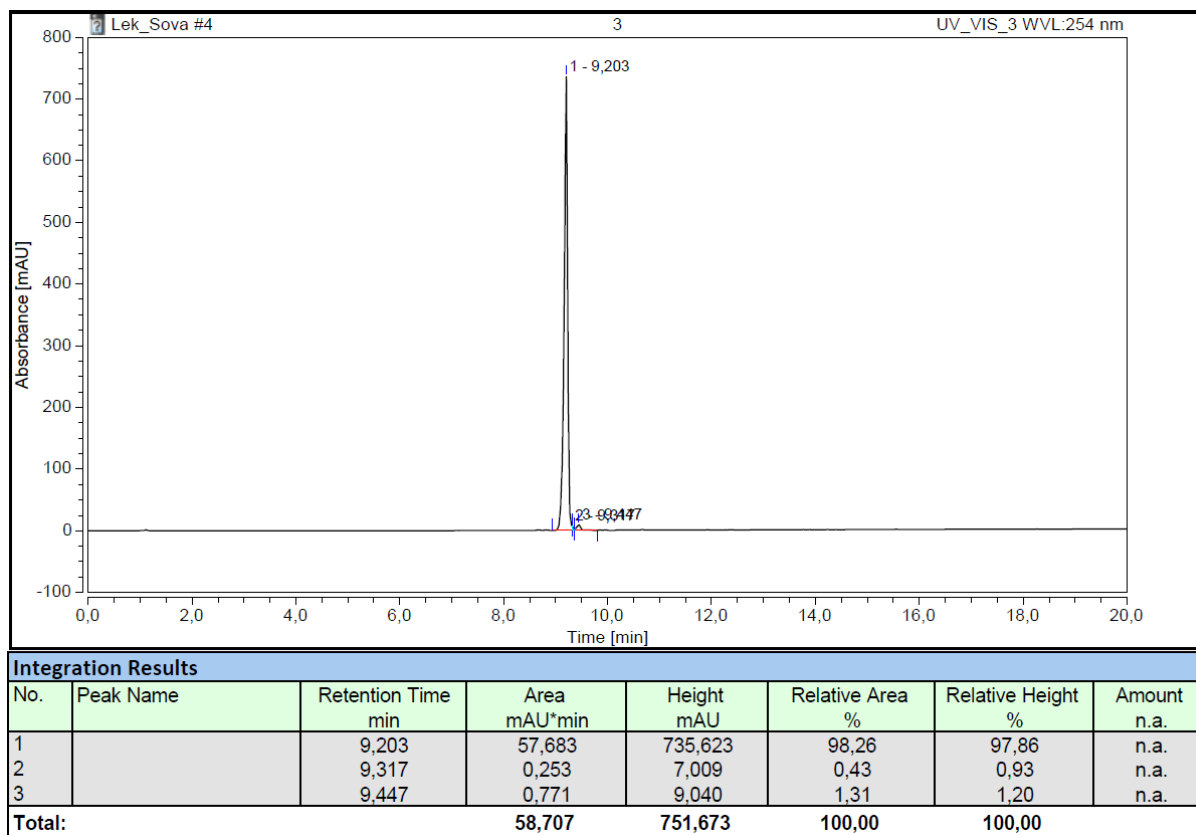

- Retention time of **9**: **9.203 min**
- HPLC purity of **9**:  $57.683/58.707 = 98.26\%$



**Figure S8**

*<sup>1</sup>H NMR spectra of 10 in CDCl<sub>3</sub>*

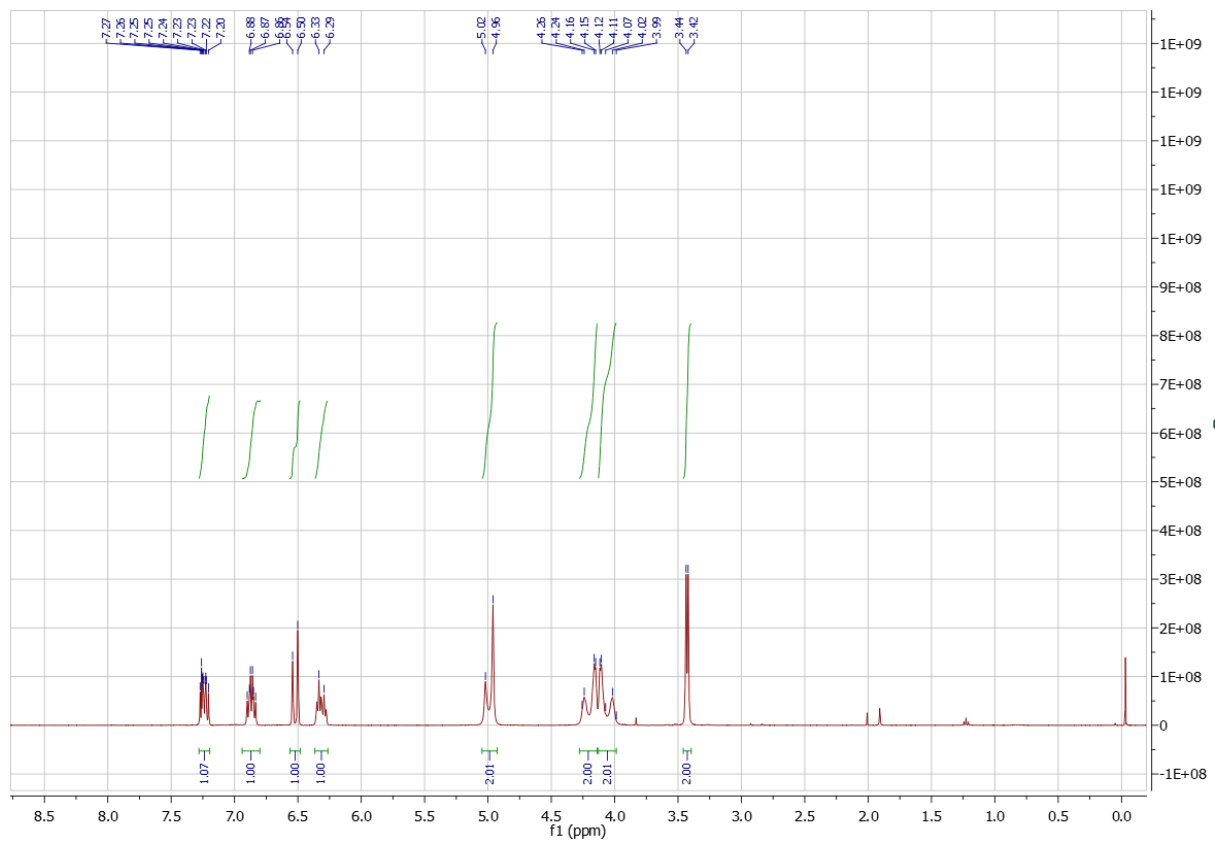

**Figure S9**

*<sup>13</sup>C NMR spectra of 10 in CDCl<sub>3</sub>*

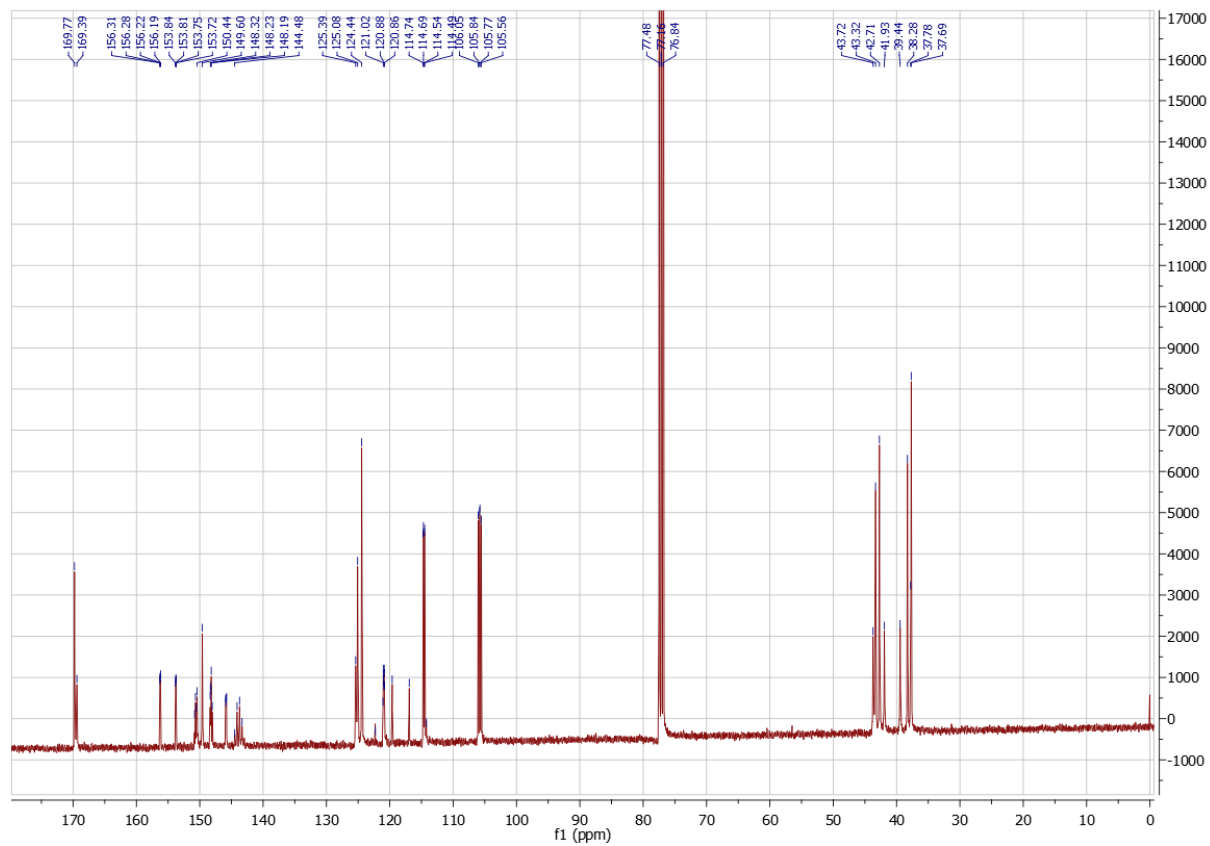

**Figure S10**

*HSQC of 10*

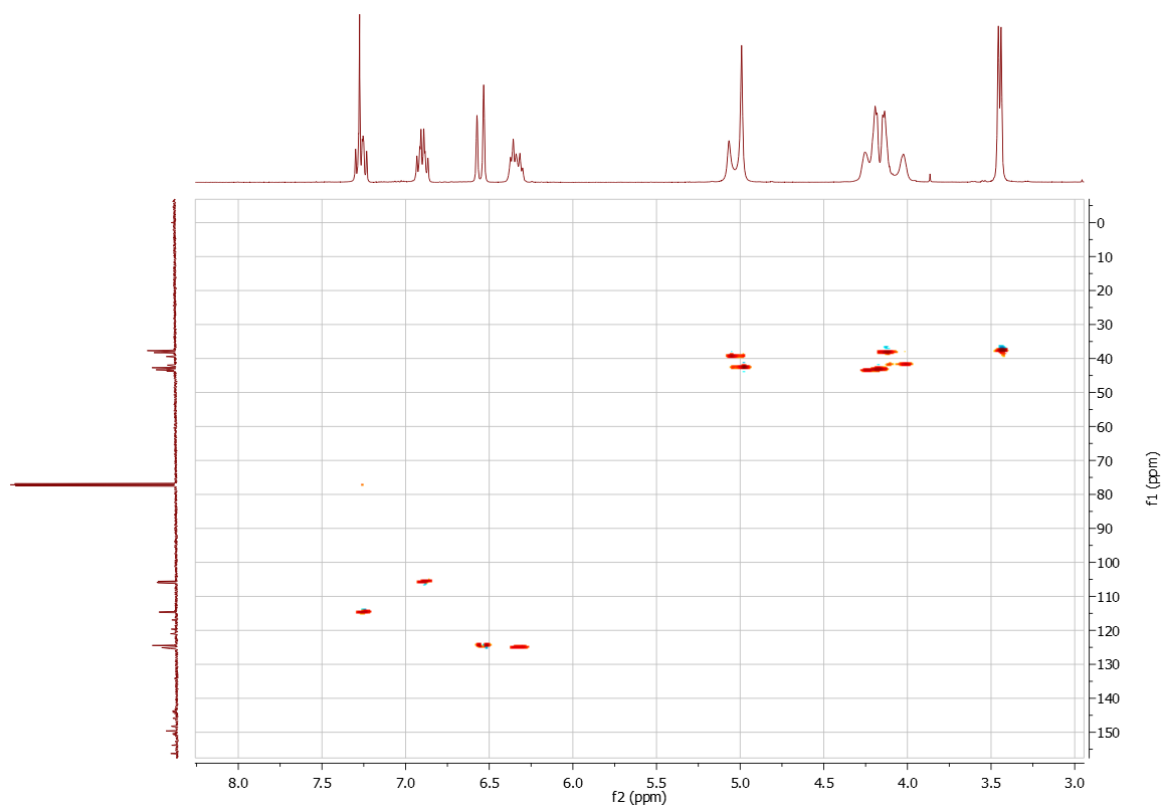

Figure S11

HMBC of 10

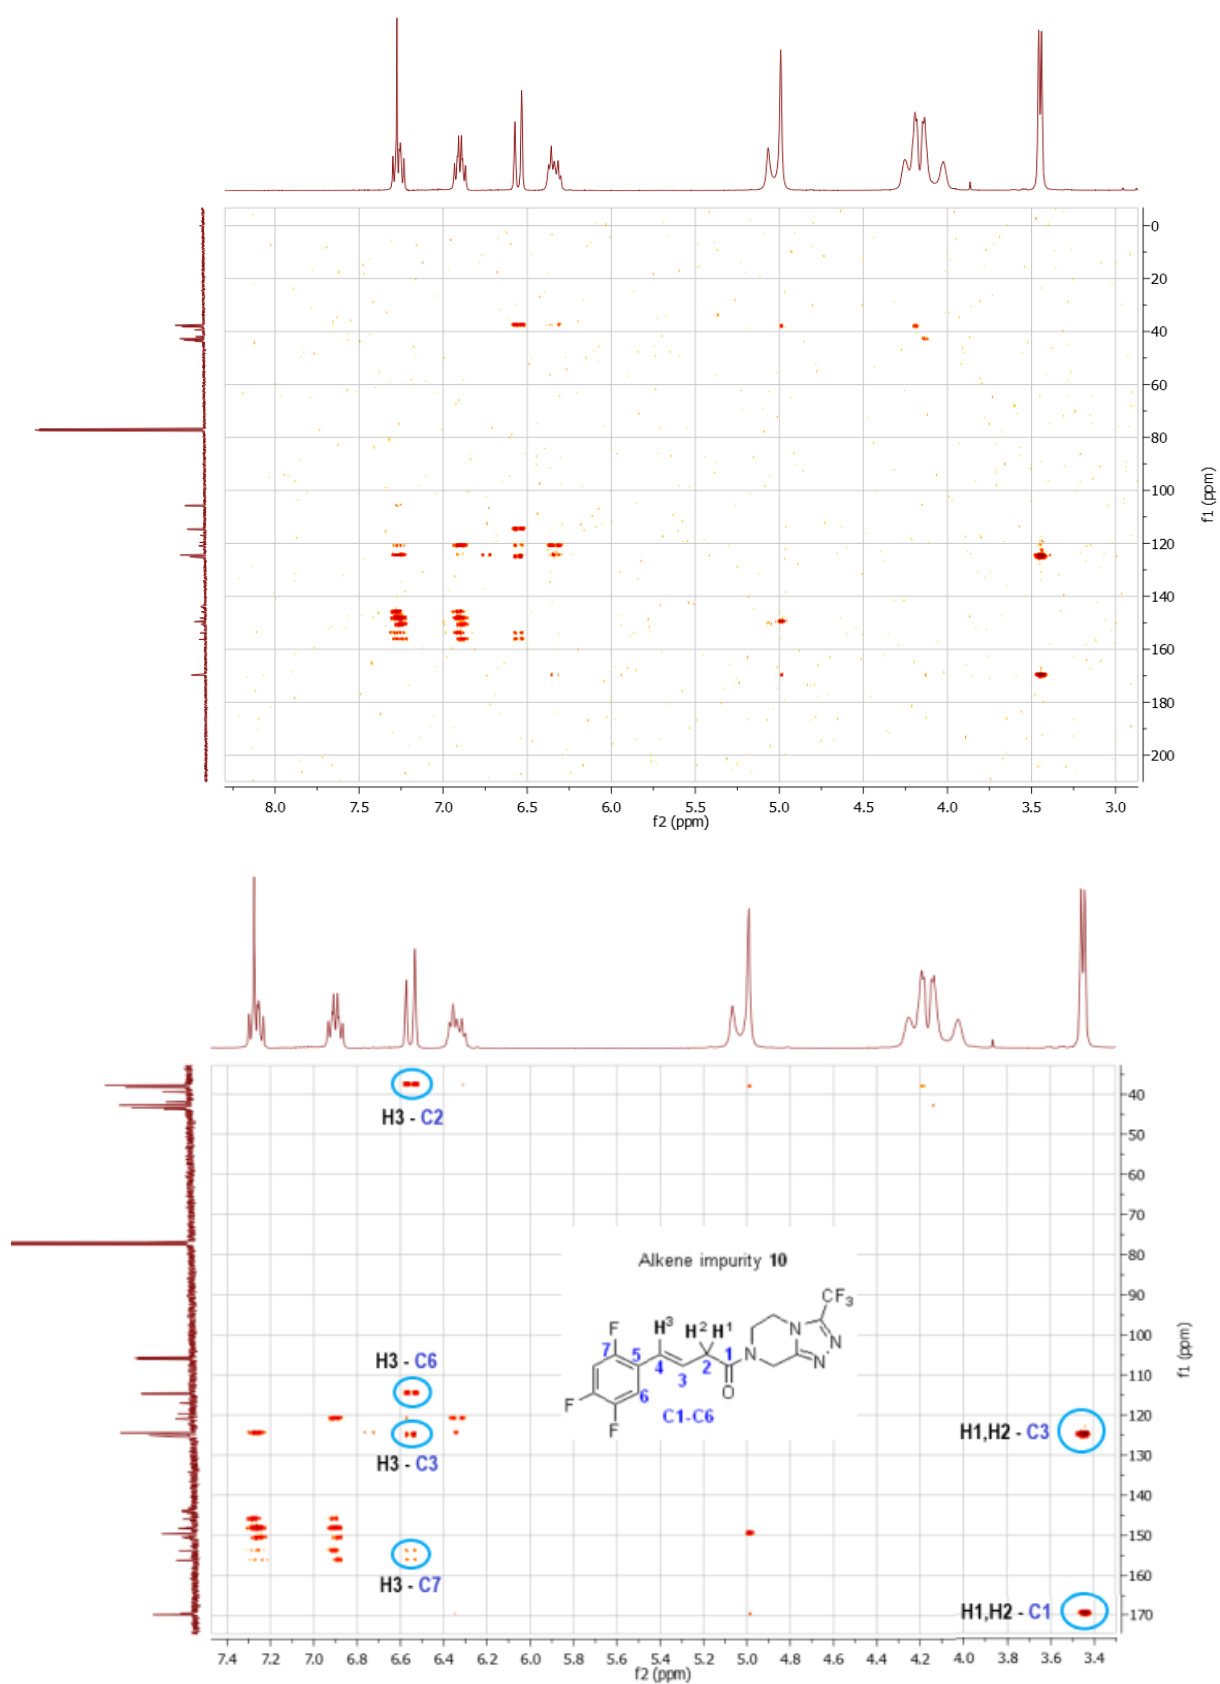

# Figure S12

## Mass spectra of 10 (ESI+)

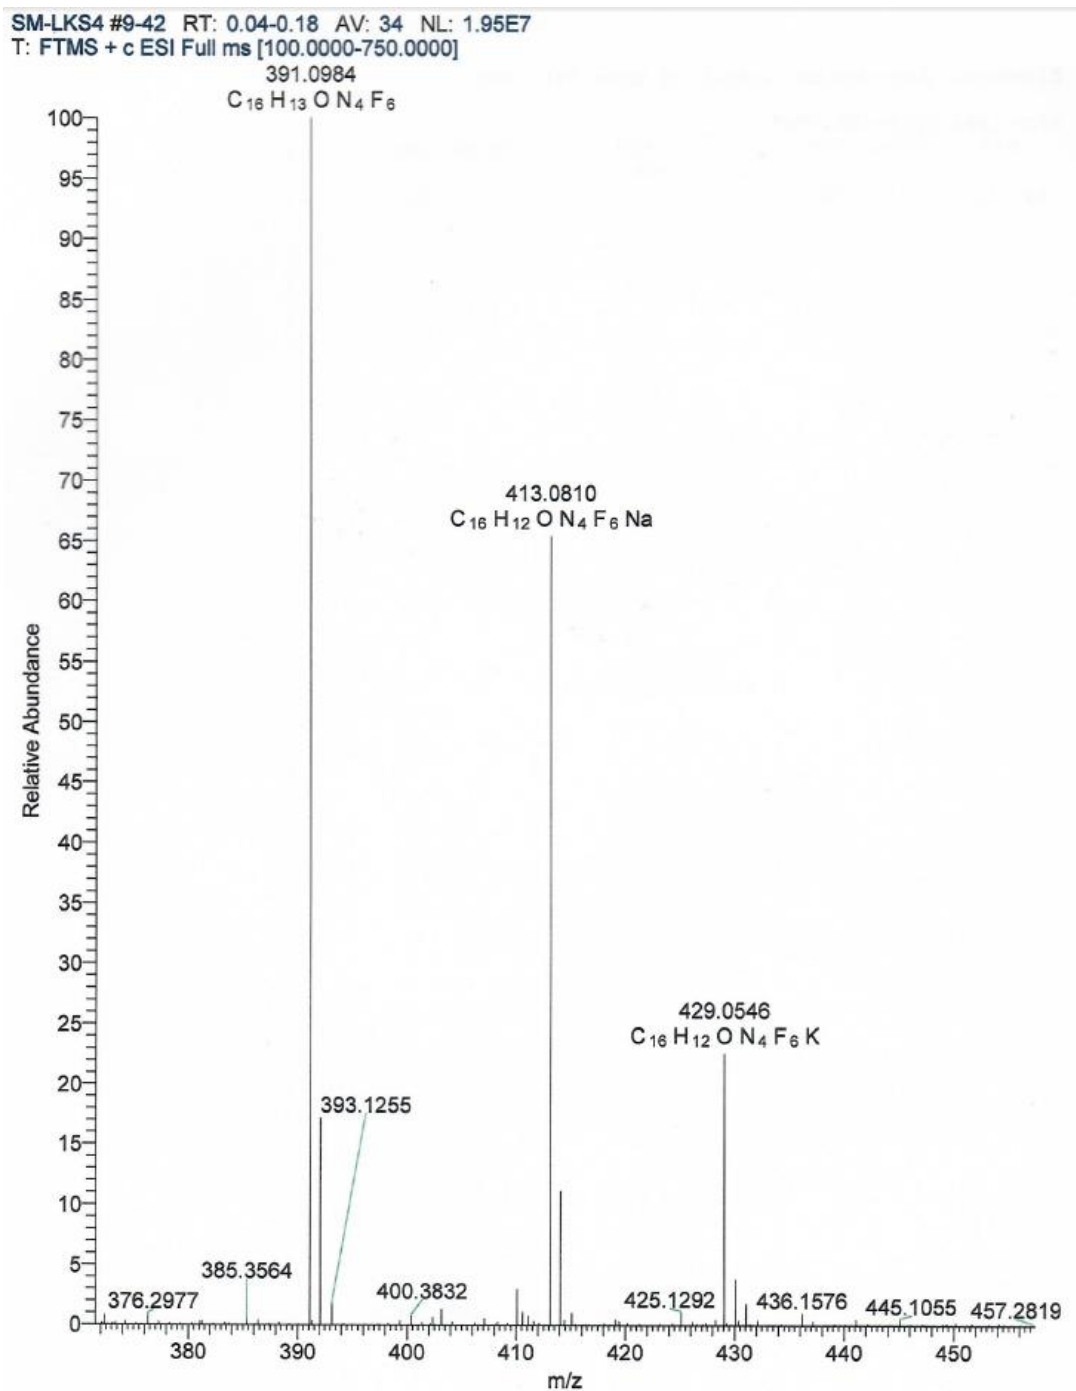

### Elemental composition search on mass 391.0985

m/z= 386.0985-396.0985

| m/z       | Theo. Mass | Delta (ppm) | RDB equiv. | Composition           |
|-----------|------------|-------------|------------|-----------------------|
| 391.09845 | 391.09881  | -0.91       | 9.5        | $C_{16}H_{13}ON_4F_6$ |

# Figure S13

## Mass spectra of 10 (ESI-)

SM-LKS4 #56-102 RT: 0.25-0.45 AV: 47 NL: 2.10E6  
 T: FTMS - c ESI Full ms [100.0000-750.0000]

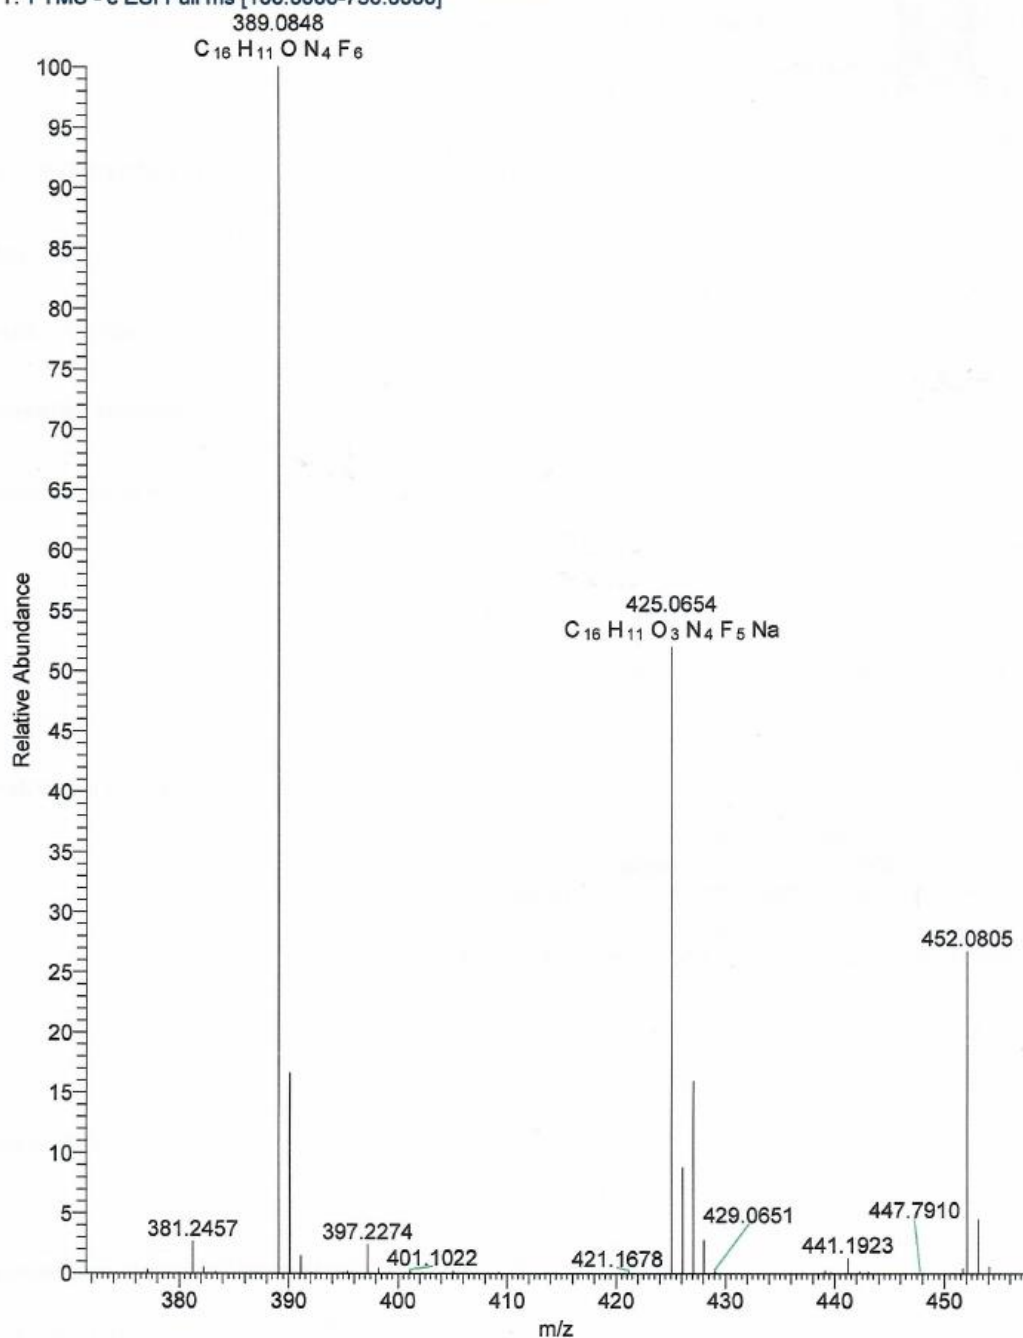

Elemental composition search on mass 389.0848

m/z= 384.0848-394.0848

| m/z       | Theo. Mass | Delta (ppm) | RDB equiv. | Composition                                                                  |
|-----------|------------|-------------|------------|------------------------------------------------------------------------------|
| 389.08481 | 389.08425  | 1.43        | 10.5       | C <sub>16</sub> H <sub>11</sub> O <sub>4</sub> N <sub>4</sub> F <sub>6</sub> |

## Figure S14

### HPLC chromatogram of 10

| No.    | Time min | Peak Name    | Peak Type | Area mAU*min | Height mAU | Amount |
|--------|----------|--------------|-----------|--------------|------------|--------|
| 1      | 8,97     | Component 5  | BMB       | 0,290        | 5,201      | n.a.   |
| 2      | 9,23     | Component 15 | BM        | 0,196        | 3,690      | n.a.   |
| 3      | 9,47     | Component 17 | MB        | 36,545       | 637,184    | n.a.   |
| TOTAL: |          |              |           | 37,03        | 646,08     | 0,00   |

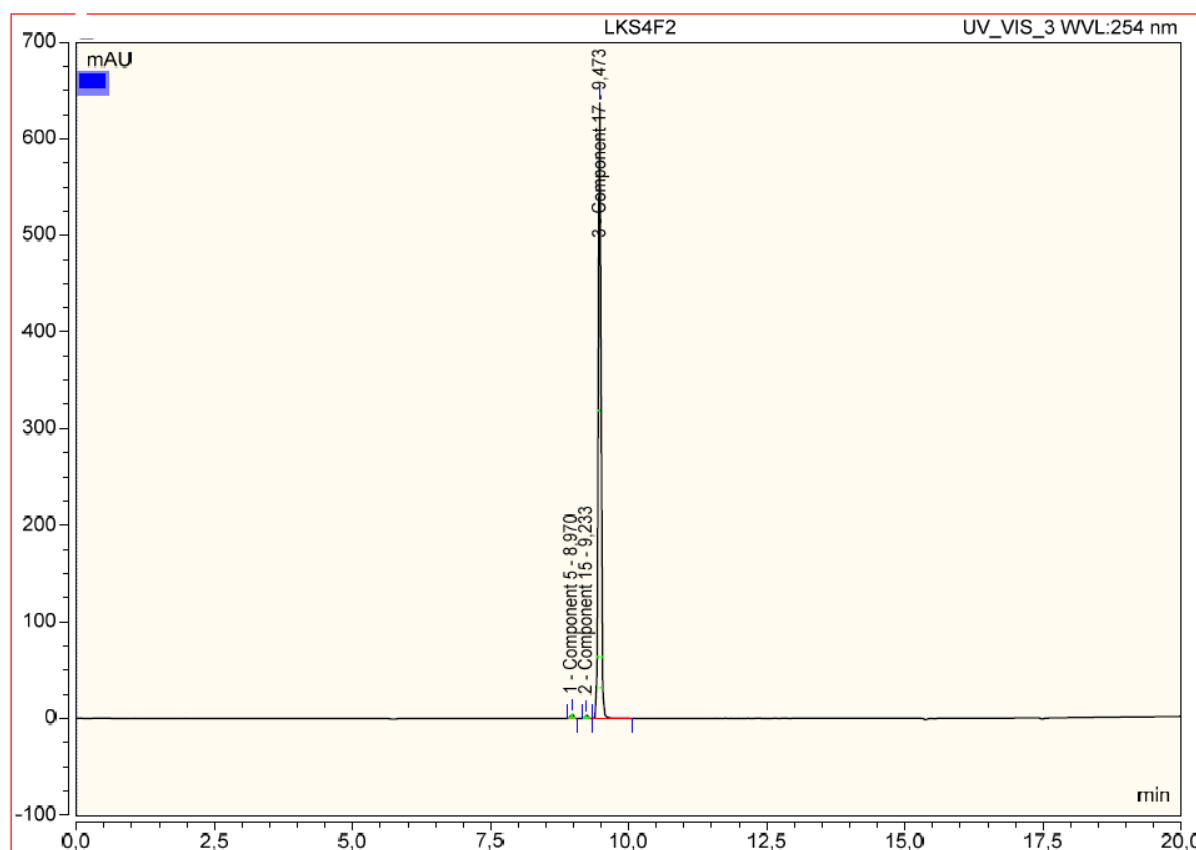

- Retention time of **10: 9.473 min**
- HPLC purity of **10:  $36.545/37.030 = 98.69\%$**

## Screening of appropriate base for regio-isomerization of **12** to **13**

When a strong base represented by NaH was used (Table S1, entries 1 and 2), approximately 77 % conversion of **12** to **13** was achieved in one hour, however, several side products were observed in the NMR spectra of the reaction mixture. Furthermore, longer reaction time (72 h) did not improve the reaction. On the other hand, in case of commonly used base triethylamine (Et<sub>3</sub>N), prolonged reaction time or 10 equivalents of a base (Table S1, entries 3-6) improved the conversion of **12** to **13** from 33 to 80 % (molar ratio of 1:0.5 to 0.25:1, respectively). Similar results were also obtained for NMM (Table S1, entries 8 and 9) after 72 h reaction time or excess of a base in contrast to one hour and one equivalent of NMM (Table S1, entry 7), where less than 10 % of alkene regio-isomerization occurred. The DBU was proved as inappropriate base for this type of reaction (Table S1, entries 10 and 11).

**Table S1.** Base screening in the alkene regio-isomerization reaction.

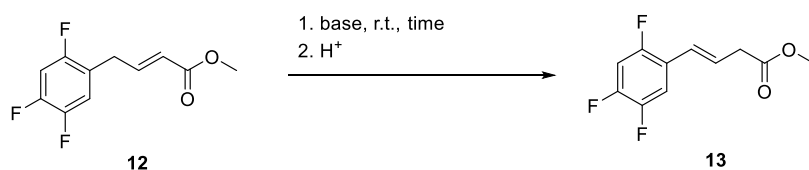

| Entry | Base <sup>a</sup> | Equivalent(s) | Time (h) | Molar ratio <b>12</b> : <b>13</b> <sup>b</sup> |
|-------|-------------------|---------------|----------|------------------------------------------------|
| 1     | NaH               | 1             | 1        | 0.30 : 1                                       |
| 2     | NaH               | 1             | 72       | ND <sup>c</sup>                                |
| 3     | Et <sub>3</sub> N | 1             | 1        | 1 : 0.50                                       |
| 4     | Et <sub>3</sub> N | 1             | 72       | 0.24 : 1                                       |
| 5     | Et <sub>3</sub> N | 10            | 1        | 0.25 : 1                                       |
| 6     | Et <sub>3</sub> N | 10            | 72       | 0.25 : 1                                       |
| 7     | NMM               | 1             | 1        | 1 : 0.10                                       |
| 8     | NMM               | 1             | 72       | 0.28 : 1                                       |
| 9     | NMM               | 10            | 72       | 0.23 : 1                                       |
| 10    | DBU               | 1             | 1        | only <b>12</b>                                 |
| 11    | DBU               | 1             | 72       | ND <sup>c</sup>                                |

<sup>a</sup> Reaction conditions: **12** (1.0 mmol), MeCN (5 mL), r.t., base (1 or 10 equiv.), time (1 or 72 h). DBU: 1,8-diazabicyclo[5.4.0]undec-7-ene, NMM: *N*-methylmorpholine, r.t.: room temperature.

<sup>b</sup> Calculated by NMR analysis.

<sup>c</sup> ND: could not be determined, many side products detected.



### Screening of optimal conditions for amide bond formation between **15** and **3**

The highest yield between coupling reagents was obtained by DCC after 2 hours (Table S2, entry 2), however, the selectivity ratio was low. Further prolongation of reaction time did not improve the yield and selectivity (Table S2, entry 3). Higher selectivity ratio was achieved when DCC was replaced by EDC. After 2 hours, less than 6 % of isomer **10** was formed (Table S2, entry 5). On the other hand, in case of 24 h reaction time selectivity ratio dropped significantly (Table S2, entry 6). To improve the yield for EDC compared to DCC, we decided to add HOBt (*N*-hydroxybenzotriazole) to the reaction mixture. This indeed improved the yields (Table S2, entries 7-9), however, it significantly decreased the selectivity (ratio between **9:10**), for example from 16 (Table S2, entry 5) to 0.7 (Table S2, entry 8). Three other coupling reagents were also examined for amidation, namely TBTU, DPPA and CDI (Table S2, entries 10-18). The reaction using TBTU or DPPA resulted in low yields and moderate selectivity (Table S2, entries 10-15) with the exception of 24 h reaction using DPPA, where selectivity ratio was below 10 %, however, with relatively low yield of 22 % (Table S2, entry 15). CDI (Table S2, entries 16-18) improved the yield, but the main product formed was a side product **10** instead of **9**. The screening of coupling reagents conferred EDC as the most appropriate one leading to amide **9** in a satisfactory yield of 61 % with good selectivity ratio 1:16 (Table S2, entry 5). On the other hand, the highest yield for amide bond formation to **9** was obtained with oxalyl chloride (Table S2, entries 19-21). The 88 % yield and 7.8 selectivity ratio was achieved after one hour reaction at 0 °C. The prolonged reaction time lowered the yield without any significant improvement of selectivity.

**Table S2.** Optimization of reaction conditions for amide bond formation to alkene impurity I (**9**).

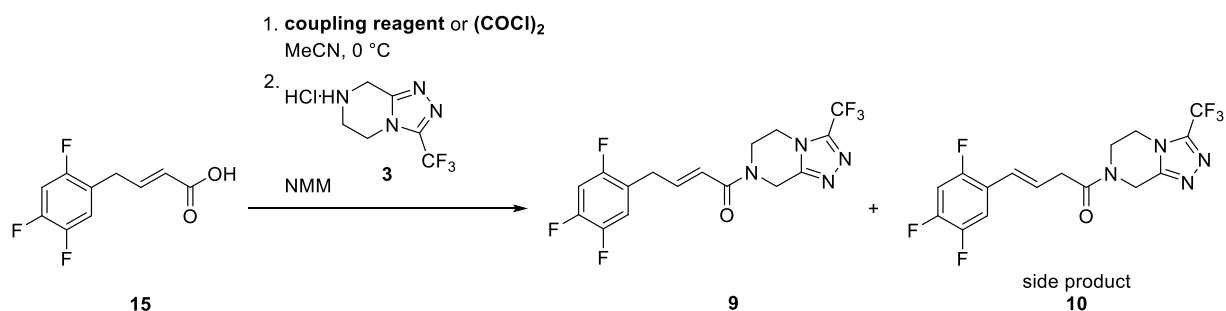

| Entry | Coupling reagent or (COCl) <sub>2</sub> <sup>a</sup> | Time (h) | Temperature | Overall Yield <b>9 + 10</b> (%) <sup>b</sup> | Selectivity ratio <b>9 : 10</b> <sup>b</sup> |
|-------|------------------------------------------------------|----------|-------------|----------------------------------------------|----------------------------------------------|
| 1     | DCC                                                  | 1        | 0 °C        | 60                                           | 5.8                                          |
| 2     | DCC                                                  | 2        | r.t.        | 77                                           | 6                                            |
| 3     | DCC                                                  | 24       | r.t.        | 72                                           | 4.5                                          |
| 4     | EDC                                                  | 1        | 0 °C        | 56                                           | 7.8                                          |
| 5     | EDC                                                  | 2        | r.t.        | 61                                           | 16                                           |
| 6     | EDC                                                  | 24       | r.t.        | 51                                           | 6.3                                          |
| 7     | EDC/HOBt                                             | 1        | 0 °C        | 61                                           | 0.65                                         |
| 8     | EDC/HOBt                                             | 2        | r.t.        | 67                                           | 0.7                                          |
| 9     | EDC/HOBt                                             | 24       | r.t.        | 68                                           | 0.76                                         |
| 10    | TBTU                                                 | 1        | 0 °C        | 23                                           | 6.3                                          |
| 11    | TBTU                                                 | 2        | r.t.        | 30                                           | 5                                            |
| 12    | TBTU                                                 | 24       | r.t.        | 44                                           | 3.9                                          |
| 13    | DPPA                                                 | 1        | 0 °C        | 1                                            | /                                            |
| 14    | DPPA                                                 | 2        | r.t.        | 10                                           | 4                                            |
| 15    | DPPA                                                 | 24       | r.t.        | 22                                           | 10                                           |
| 16    | CDI                                                  | 1        | 0 °C        | 48                                           | 0.2                                          |
| 17    | CDI                                                  | 2        | r.t.        | 72                                           | 0.12                                         |
| 18    | CDI                                                  | 24       | r.t.        | 75                                           | 0.09                                         |
| 19    | (COCl) <sub>2</sub>                                  | 1        | 0 °C        | 88                                           | 7.8                                          |
| 20    | (COCl) <sub>2</sub>                                  | 2        | r.t.        | 81                                           | 8                                            |
| 21    | (COCl) <sub>2</sub>                                  | 24       | r.t.        | 81                                           | 4.3                                          |

<sup>a</sup> Reaction conditions: **Coupling reagent method:** i) **15** (0.50 mmol, 0.108 g), MeCN (5 mL), 0 °C, *coupling reagent* (0.50 mmol), 0.5 h; ii) **3** × HCl (0.5 mmol, 0.114 g), NMM (0.50 mmol, 0.055 mL), 0 °C for 1 h, then r.t. for 1-24 h. **Acid chloride method:** i) **15** (0.46 mmol, 0.10 g), CH<sub>2</sub>Cl<sub>2</sub>, oxalyl chloride (0.92 mmol, 0.078 mL), DMF (cat.), 0 °C, 1.5 h; ii) **3** × HCl (0.46 mmol, 0.105 g), NMM (0.92 mmol, 0.10 mL), MeCN (5 mL), 0 °C for 1 h, then r.t. for 1-24 h.

<sup>b</sup> Determined by HPLC.

### Screening of optimal solvent for amide bond formation in coupling of 15 and 3

The 1 h reaction at 0 °C in MeCN, CH<sub>2</sub>Cl<sub>2</sub>, THF, EtOAc, and DMF (Table S3, entries 1, 3, 5, 7 and 9) led to low or moderate yields (from 17 % to 67 %) with the highest selectivity ratio of 31.9 obtained in DMF (Table S3, entry 9). Performing a reaction at room temperature for additional 1 h had beneficial effect on the reaction yield compared to 0 °C with very little effect on the selectivity (Table S3, entries 2, 6, 8, and 10). The only exception was CH<sub>2</sub>Cl<sub>2</sub>, where temperature did not influence the yield and selectivity significantly (Table S3, entries 3 and 4). Nevertheless, DMF was selected as the most optimal solvent with 77 % yield and selectivity ratio of 30.4 (Table S3, entry 10). In case of the carboxylic acid activation with oxalyl chloride (Table S3, entries 11-14), the reaction in THF was the most optimal leading to promising 84 % yield and 30.8 selectivity ratio (Table S3, entry 13). The highest yield in solvent screening was on the other hand obtained with oxalyl chloride and further amidation in MeCN at 0 °C (Table S3, entry 11), however, the selectivity ratio was very low. Therefore, THF was selected as the most optimal solvent for further optimization of an acid chloride method.

**Table S3.** Solvent screening for amidation to alkene impurity I (**9**).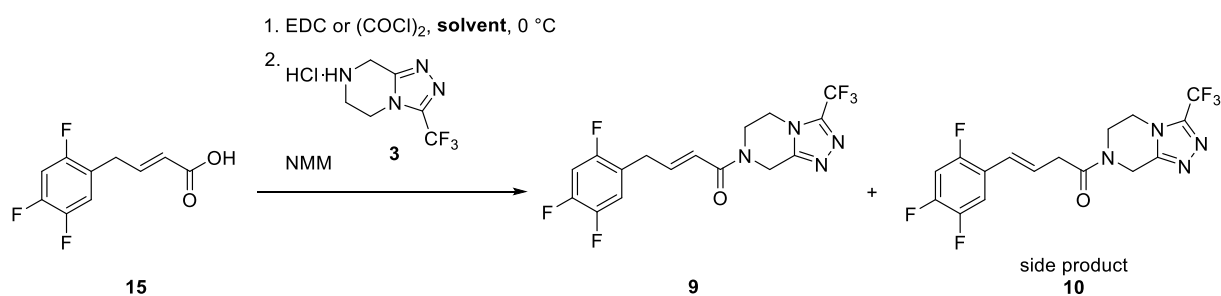

| Entry | Solvent                         | Activating Reagent  | Time (h) | Temperature | Overall Yield <b>9 + 10</b> (%) <sup>a,b</sup> | Selectivity ratio <b>9 : 10</b> <sup>b</sup> |
|-------|---------------------------------|---------------------|----------|-------------|------------------------------------------------|----------------------------------------------|
| 1     | MeCN                            | EDC                 | 1        | 0 °C        | 55                                             | 12.9                                         |
| 2     | MeCN                            | EDC                 | 2        | r.t.        | 61                                             | 16.1                                         |
| 3     | CH <sub>2</sub> Cl <sub>2</sub> | EDC                 | 1        | 0 °C        | 67                                             | 14.6                                         |
| 4     | CH <sub>2</sub> Cl <sub>2</sub> | EDC                 | 2        | r.t.        | 62                                             | 13.7                                         |
| 5     | THF                             | EDC                 | 1        | 0 °C        | 18                                             | 31.5                                         |
| 6     | THF                             | EDC                 | 2        | r.t.        | 31                                             | 31.3                                         |
| 7     | EtOAc                           | EDC                 | 1        | 0 °C        | 17                                             | 30.2                                         |
| 8     | EtOAc                           | EDC                 | 2        | r.t.        | 46                                             | 28                                           |
| 9     | DMF                             | EDC                 | 1        | 0 °C        | 53                                             | 31.9                                         |
| 10    | DMF                             | EDC                 | 2        | r.t.        | 77                                             | 30.4                                         |
| 11    | MeCN                            | (COCl) <sub>2</sub> | 1        | 0 °C        | 88                                             | 7.8                                          |
| 12    | CH <sub>2</sub> Cl <sub>2</sub> | (COCl) <sub>2</sub> | 1        | 0 °C        | 69                                             | 13.3                                         |
| 13    | THF                             | (COCl) <sub>2</sub> | 1        | 0 °C        | 84                                             | 30.8                                         |
| 14    | EtOAc                           | (COCl) <sub>2</sub> | 1        | 0 °C        | 81                                             | 31                                           |

<sup>a</sup> Reaction conditions **Coupling reagent method**: i) **15** (0.50 mmol, 0.108 g), solvent (5 mL), 0 °C, EDC × HCl (0.50 mmol, 0.096 g, 0.5 h); ii) **3** × HCl (0.5 mmol, 0.114 g), NMM (0.50 mmol, 0.055 mL), 0 °C for 1 h, then r.t. for 1-24 h. **Acid chloride method**: i) **15** (0.46 mmol, 0.10 g), CH<sub>2</sub>Cl<sub>2</sub>, oxalyl chloride (0.92 mmol, 0.079 mL), DMF (cat.), 0 °C, 1.5 h; ii) **3** × HCl (0.46 mmol, 0.105 g), NMM (0.92 mmol, 0.10 mL), solvent (5 mL), 0 °C, 1 h.

<sup>b</sup> Determined by HPLC.

**Figure S15**

NMR study of regio-isomerization process of **9** to **10** in deuterated DMF in the presence of NMM as a base.

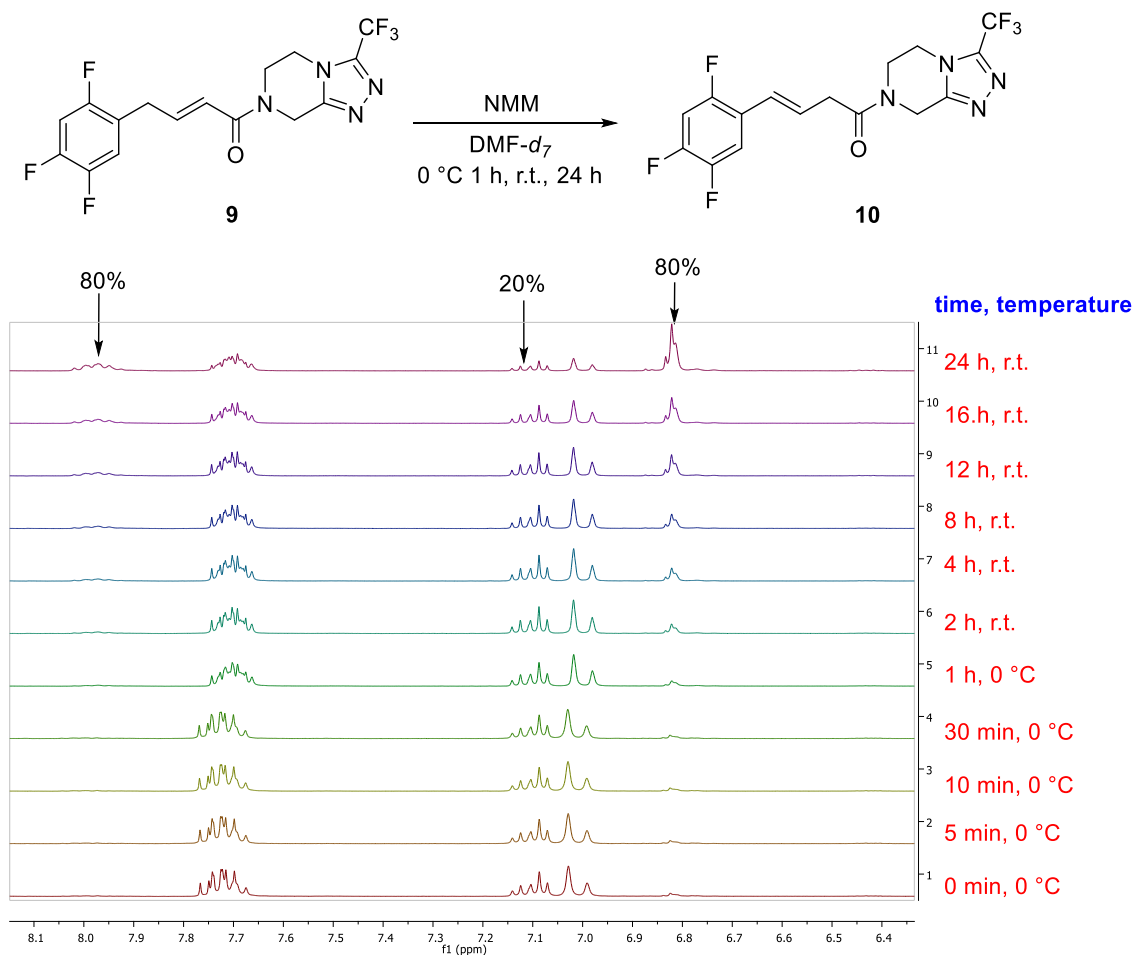

## Figure S16

NMR study of regio-isomerization process of **9** to **10** in deuterated THF in the presence of Et<sub>3</sub>N as a base.

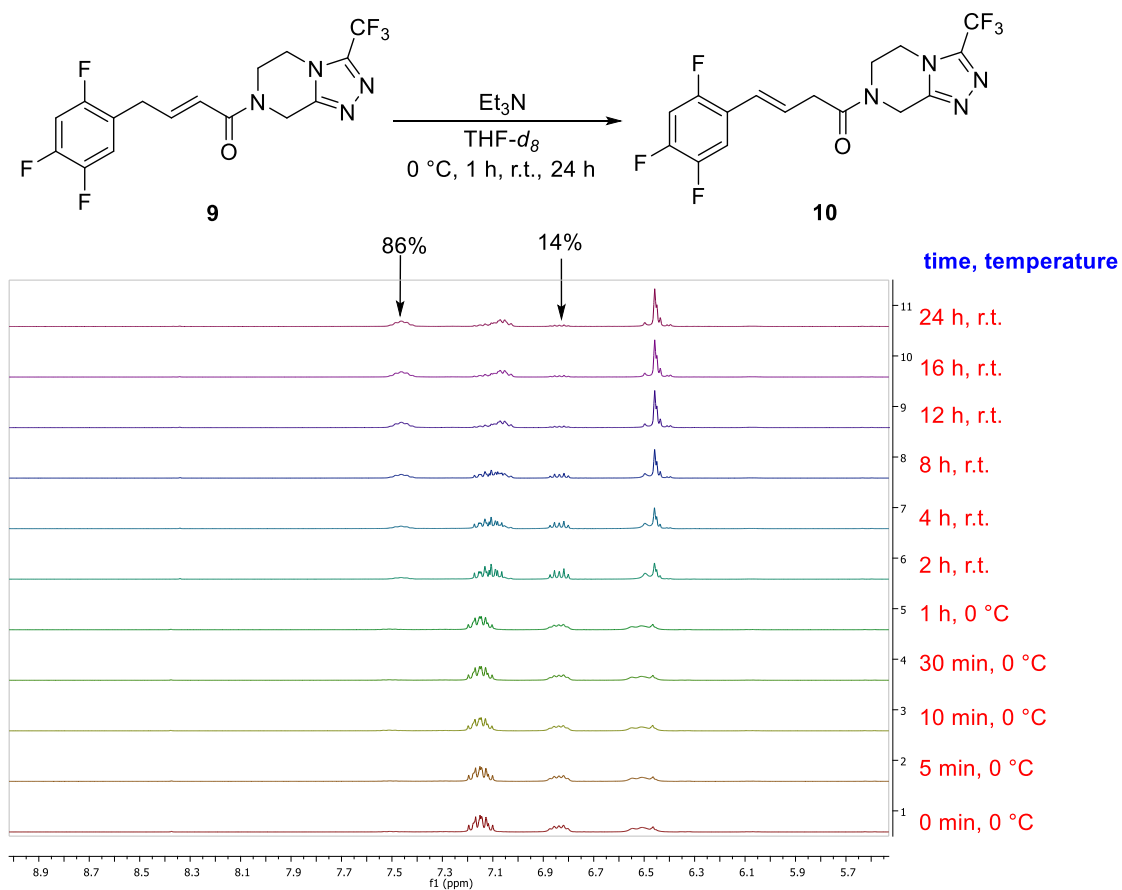

## Reactions screening procedures described in tables

*General procedure for base scan (Table S1):* To a solution of methyl (*E*)-4-(2,4,5-trifluorophenyl)but-2-enoate **12** (1.0 mmol, 0.23 g) in acetonitrile (5 mL) the selected *base* was added. The reaction mixture was stirred for selected *time* at room temperature. Then 1 M HCl (5 mL) was added and the solution/suspension obtained was extracted with diethyl ether (3 × 20 mL). The combined organic phases were washed with brine (25 mL), dried with anhydrous Na<sub>2</sub>SO<sub>4</sub>, filtered, and evaporated under reduced pressure. The oily residue was dissolved in DMSO-*d*<sub>6</sub> and <sup>1</sup>H NMR spectra was recorded.

*General procedure for hydrolysis of 12 to 14/15 (Table 1):* To a solution of methyl (*E*)-4-(2,4,5-trifluorophenyl)but-2-enoate **12** (1.0 mmol, 0.23 g) in 1,4-dioxane (5 mL) the selected *solvent* (H<sub>2</sub>O/NaOH or H<sub>2</sub>O/HCl, 5 mL) was added. The reaction mixture was stirred for selected *time* at selected *temperature*. Then pH was adjusted to 1 (if needed) with 1 M HCl (5 mL) and the solution/suspension obtained was extracted with diethyl ether (3 × 20 mL). The combined organic phases were washed with brine (25 mL), dried with anhydrous Na<sub>2</sub>SO<sub>4</sub>, filtered, and evaporated under reduced pressure. The oily residue was dissolved in DMSO-*d*<sub>6</sub> and <sup>1</sup>H NMR spectra was recorded.

**General procedure for amide bond formation to alkene impurity I (9) (Table S2):**

**Screening of coupling reagents:** (*E*)-4-(2,4,5-trifluorophenyl)but-2-enoic acid **15** (0.5 mmol, 0.108 g) was dissolved in acetonitrile (5 mL) and cooled to 0 °C. Selected *coupling reagent* (0.5 mmol) was added and the reaction was stirred at 0 °C for 0.5 h. Then 3 × HCl (0.5 mmol, 0.114 g) and NMM (0.5 mmol, 0.055 mL) were added. The resulting reaction mixture was stirred for 1 h at 0 °C (HPLC sample1), 1 h at room temperature (HPLC sample 2) and then 24 h at room temperature (HPLC sample 3).

**Activation via acid chloride:** (*E*)-4-(2,4,5-trifluorophenyl)but-2-enoic acid **15** (0.46 mmol, 0.10 g) was dissolved in CH<sub>2</sub>Cl<sub>2</sub> (5 mL), and cooled to 0 °C. Oxalyl chloride (0.92 mmol, 0.079 mL) was added and the reaction was stirred at 0 °C for 0.5 h. The solvent was then evaporated and the residue dissolved in acetonitrile (2.5 mL).

Afterwards, the yellow solution obtained was cooled down to 0 °C and quickly added to a cooled (0 °C) solution of **3** × HCl (0.46 mmol, 0.105 g) and NMM (0.92 mmol, 0.10 mL) in acetonitrile (2.5 mL), which was stirred for 1 h at room temperature prior the addition. The resulting reaction mixture was stirred for 1 h at 0 °C (*HPLC sample 1*), 1 h at room temperature (*HPLC sample 2*) and then 24 h at room temperature (*HPLC sample 3*).

**General procedure for solvent screening for amidation to alkene impurity I (9)**

(*Table S3*):

**Screening of solvent (EDC method):** (*E*)-4-(2,4,5-trifluorophenyl)but-2-enoic acid **15** (0.50 mmol, 0.108 g) was dissolved in the selected *solvent* (5 mL), and cooled to 0 °C. EDC × HCl (0.50 mmol, 0.096 g) was added and the reaction mixture was stirred at 0 °C for 0.5 h. Afterwards, **3** × HCl (0.50 mmol, 0.114 g) and NMM (0.50 mmol, 0.055 mL) were added. The resulting reaction mixture was stirred 1 h at 0 °C (*HPLC sample 1*) and 1 h at room temperature (*HPLC sample 2*).

**Screening of solvents (acid chloride method):** (*E*)-4-(2,4,5-trifluorophenyl)but-2-enoic acid **15** (0.46 mmol, 0.10 g) was dissolved in CH<sub>2</sub>Cl<sub>2</sub> (5 mL), and cooled to 0 °C. Oxalyl chloride (0.92 mmol, 0.079 mL) was added and the reaction was stirred at 0 °C for 0.5 h. CH<sub>2</sub>Cl<sub>2</sub> was evaporated and the residue dissolved in selected *solvent* (2.5 mL). The solution obtained was cooled down to 0 °C and quickly added to a cooled (0 °C) solution of **3** × HCl (0.46 mmol, 0.105 g) and NMM (0.92 mmol, 0.10 mL) in selected *solvent* (2.5 mL), which was stirred for 1 h at room temperature prior the addition. The resulting reaction mixture was stirred 1 h at 0 °C (*HPLC sample 1*).

**General procedure for base screening for amidation to alkene impurity I (9)**

(*Table 2*):

**Screening of bases (EDC method):** (*E*)-4-(2,4,5-trifluorophenyl)but-2-enoic acid **15** (0.50 mmol, 0.108 g) was dissolved in DMF (5 mL) and cooled to 0 °C. EDC (0.50 mmol, 0.089 g) was added and the reaction mixture was stirred at 0 °C for 0.5 h. Then **3** × HCl (0.50 mmol, 0.114 g) and selected *base* (0.50 mmol) were added. The resulting reaction mixture was stirred 1 h at 0 °C (*HPLC sample 1*) and 1 h at room temperature (*HPLC sample 2*).



**Screening of bases (acid chloride method):** (*E*)-4-(2,4,5-trifluorophenyl)but-2-enoic acid **15** (0.46 mmol, 0.10 g) was dissolved in CH<sub>2</sub>Cl<sub>2</sub> (5 mL), and cooled to 0 °C. Oxalyl chloride (0.92 mmol, 0.079 mL) was added and the reaction was stirred at 0 °C for 0.5 h. CH<sub>2</sub>Cl<sub>2</sub> was evaporated and the residue dissolved in THF (2.5 mL). The solution obtained was cooled down to 0 °C and quickly added to a cooled (0 °C) solution of **3** × HCl (0.46 mmol, 0.105 g) and selected *base* (0.92 mmol) in THF (2.5 mL), which was stirred for 1 h at room temperature prior the addition. The resulting reaction mixture was stirred 1 h at 0 °C (*HPLC sample 1*).
